# Supplementary material for: Oestrogen Activates the MAP3K1 Cascade and β-Catenin to Promote Granulosa-like Cell Fate in a Human Testis-Derived Cell Line
Source: MDPI journal article supplement (doi:10.3390/ijms221810046), 2021-09-17
Supplement: s1 [file s1]

## Supplementary tables

**Table S1. Fold enrichment and p-values of terms enriched in proteome following EE2 treatment reported in Figures 4 and 5.**

| PANTHER GO term                                           | Fold enrichment | FDR-adjusted p-value | Timepoint |
|-----------------------------------------------------------|-----------------|----------------------|-----------|
| ribose phosphate biosynthetic process (GO:0046390)        | 24.65           | 4.91E-02             | 30 min    |
| cytoskeleton organization (GO:0007010)                    | 3.64            | 3.49E-03             | 30 min    |
| Arp2/3 complex-mediated actin nucleation (GO:0034314)     | 17.12           | 1.30E-02             | 30 min    |
| nucleotide-sugar metabolic process (GO:0009225)           | 12.84           | 2.20E-02             | 30 min    |
| purine-containing compound metabolic process (GO:0072521) | 10.27           | 3.68E-02             | 30 min    |
| nucleoside triphosphate metabolic process (GO:0009141)    | 8.99            | 1.47E-02             | 30 min    |
| actin filament polymerization (GO:0030041)                | 6.27            | 1.91E-02             | 30 min    |
| monosaccharide metabolic process (GO:0005996)             | 4.11            | 4.39E-02             | 30 min    |
| cellular component morphogenesis (GO:0032989)             | 3.33            | 4.82E-02             | 30 min    |
| nuclear pore central transport channel (GO:0044613)       | 11.74           | 1.44E-02             | 30 min    |
| protein-containing complex (GO:0032991)                   | 1.56            | 1.46E-02             | 30 min    |
| cytosolic ribosome (GO:0022626)                           | 4.07            | 7.10E-03             | 30 min    |
| ribonucleoprotein complex (GO:1990904)                    | 3.17            | 1.40E-03             | 30 min    |
| nucleolar part (GO:0044452)                               | 5.48            | 5.70E-03             | 30 min    |
| nucleolus (GO:0005730)                                    | 5.14            | 7.13E-06             | 30 min    |
| cytoskeletal part (GO:0044430)                            | 6.6             | 1.10E-03             | 30 min    |
| actin cytoskeleton (GO:0015629)                           | 4.57            | 7.28E-07             | 30 min    |
| cytoskeleton (GO:0005856)                                 | 2.57            | 8.56E-05             | 30 min    |
| spliceosomal snRNP complex (GO:0097525)                   | 3.83            | 4.56E-02             | 30 min    |
| nucleotide-sugar metabolic process                        | 8.57            | 1.61E-02             | 48 hr     |

|                                                            |      |          |       |
|------------------------------------------------------------|------|----------|-------|
| (GO:0009225)                                               |      |          |       |
| metabolic process (GO:0008152)                             | 1.45 | 3.65E-07 | 48 hr |
| mRNA cis splicing, via spliceosome (GO:0045292)            | 7.95 | 3.97E-03 | 48 hr |
| RNA splicing (GO:0008380)                                  | 3.76 | 4.46E-06 | 48 hr |
| gene expression (GO:0010467)                               | 1.46 | 5.60E-03 | 48 hr |
| ribosomal large subunit biogenesis (GO:0042273)            | 5.54 | 1.66E-02 | 48 hr |
| ribonucleoprotein complex biogenesis (GO:0022613)          | 2.98 | 8.48E-03 | 48 hr |
| cellular component organization or biogenesis (GO:0071840) | 2.61 | 4.47E-03 | 48 hr |
| regulation of mRNA processing (GO:0050684)                 | 4.42 | 5.81E-03 | 48 hr |
| chromatin organization (GO:0006325)                        | 2.9  | 1.12E-02 | 48 hr |
| cellular protein localization (GO:0034613)                 | 1.77 | 3.29E-03 | 48 hr |
| intracellular protein transport (GO:0006886)               | 1.73 | 1.64E-02 | 48 hr |
| transcriptional repressor complex (GO:0017053)             | 9.52 | 7.77E-03 | 48 hr |
| nuclear lumen (GO:0031981)                                 | 2.24 | 3.25E-05 | 48 hr |
| intracellular membrane-bounded organelle (GO:0043231)      | 1.53 | 1.14E-05 | 48 hr |
| protein-containing complex (GO:0032991)                    | 1.45 | 5.56E-03 | 48 hr |
| proteasome core complex (GO:0005839)                       | 5.44 | 4.12E-02 | 48 hr |
| nuclear speck (GO:0016607)                                 | 7.91 | 2.53E-04 | 48 hr |
| ribonucleoprotein complex (GO:1990904)                     | 3.04 | 1.10E-05 | 48 hr |
| U2-type spliceosomal complex (GO:0005684)                  | 4.73 | 3.43E-02 | 48 hr |
| preribosome (GO:0030684)                                   | 3.76 | 2.21E-03 | 48 hr |
| cell-cell junction (GO:0005911)                            | 3.92 | 2.74E-03 | 48 hr |
| nucleolus (GO:0005730)                                     | 2.54 | 1.52E-02 | 48 hr |
| actin cytoskeleton (GO:0015629)                            | 2.23 | 1.46E-02 | 48 hr |
| cytoskeleton (GO:0005856)                                  | 1.63 | 4.18E-02 | 48 hr |
| endoplasmic reticulum (GO:0005783)                         | 2.17 | 1.09E-02 | 48 hr |
| vacuole (GO:0005773)                                       | 1.74 | 7.58E-05 | 48 hr |
| cytosol (GO:0005829)                                       | 1.72 | 5.76E-03 | 48 hr |
| plasma membrane (GO:0005886)                               | 1.34 | 1.63E-02 | 48 hr |

**Table S2. Fold enrichment and p-values of terms enriched in phosphoproteome following EE2 treatment reported in Figures 4 and 5.**

| <b>PANTHER GO term</b>                                           | <b>Fold enrichment</b> | <b>FDR-adjusted p-value</b> | <b>Timepoint</b> |
|------------------------------------------------------------------|------------------------|-----------------------------|------------------|
| regulation of supramolecular fiber organization (GO:1902903)     | 19.52                  | 9.83E-03                    | 30 min           |
| regulation of cellular component organization (GO:0051128)       | 4.46                   | 2.12E-05                    | 30 min           |
| regulation of RNA biosynthetic process (GO:2001141)              | 2.02                   | 1.02E-02                    | 30 min           |
| regulation of metabolic process (GO:0019222)                     | 1.99                   | 9.59E-05                    | 30 min           |
| regulation of microtubule cytoskeleton organization (GO:0070507) | 9.41                   | 6.99E-03                    | 30 min           |
| regulation of cytoskeleton organization (GO:0051493)             | 6.39                   | 5.88E-03                    | 30 min           |
| regulation of organelle organization (GO:0033043)                | 5.17                   | 9.65E-04                    | 30 min           |
| microtubule depolymerization (GO:0007019)                        | 11.56                  | 1.03E-02                    | 30 min           |
| protein-containing complex disassembly (GO:0032984)              | 7.12                   | 1.69E-02                    | 30 min           |
| gene expression (GO:0010467)                                     | 2.05                   | 3.42E-07                    | 30 min           |
| transcription by RNA polymerase II (GO:0006366)                  | 2.04                   | 9.09E-04                    | 30 min           |
| regulation of mRNA processing (GO:0050684)                       | 6.38                   | 2.33E-03                    | 30 min           |
| RNA splicing (GO:0008380)                                        | 4.99                   | 7.69E-06                    | 30 min           |
| RNA processing (GO:0006396)                                      | 4.71                   | 4.94E-07                    | 30 min           |
| RNA catabolic process (GO:0006401)                               | 4.04                   | 4.08E-02                    | 30 min           |
| neuron development (GO:0048666)                                  | 3.83                   | 1.83E-03                    | 30 min           |
| actin cytoskeleton organization (GO:0030036)                     | 2.94                   | 4.02E-02                    | 30 min           |
| mitotic nuclear division (GO:0140014)                            | 2.94                   | 2.15E-02                    | 30 min           |
| intracellular organelle (GO:0043229)                             | 1.85                   | 5.48E-07                    | 30 min           |
| ribonucleoprotein complex (GO:1990904)                           | 3.2                    | 1.57E-03                    | 30 min           |
| small nuclear ribonucleoprotein complex (GO:0030532)             | 4.05                   | 4.89E-02                    | 30 min           |

|                                                                     |       |          |        |
|---------------------------------------------------------------------|-------|----------|--------|
| cytoskeleton (GO:0005856)                                           | 2.37  | 8.97E-04 | 30 min |
| microtubule cytoskeleton (GO:0015630)                               | 2.62  | 3.99E-03 | 30 min |
| cell cycle (GO:0007049)                                             | 2.81  | 1.97E-06 | 48 hr  |
| organelle organization (GO:0006996)                                 | 2.26  | 1.84E-04 | 48 hr  |
| reproductive process (GO:0022414)                                   | 4.16  | 3.08E-02 | 48 hr  |
| neuron development (GO:0048666)                                     | 3.06  | 1.85E-02 | 48 hr  |
| regulation of cellular component organization (GO:0051128)          | 3.7   | 4.51E-04 | 48 hr  |
| regulation of supramolecular fiber organization (GO:1902903)        | 18.01 | 8.54E-03 | 48 hr  |
| regulation of RNA biosynthetic process (GO:2001141)                 | 1.92  | 1.62E-02 | 48 hr  |
| regulation of metabolic process (GO:0019222)                        | 2.17  | 5.99E-07 | 48 hr  |
| regulation of protein modification process (GO:0031399)             | 15.2  | 4.94E-02 | 48 hr  |
| regulation of cytoskeleton organization (GO:0051493)                | 5.16  | 2.15E-02 | 48 hr  |
| regulation of microtubule cytoskeleton organization (GO:0070507)    | 8.69  | 6.44E-03 | 48 hr  |
| regulation of organelle organization (GO:0033043)                   | 4.77  | 1.38E-03 | 48 hr  |
| microtubule depolymerization (GO:0007019)                           | 10.67 | 9.43E-03 | 48 hr  |
| protein-containing complex disassembly (GO:0032984)                 | 7.67  | 3.98E-03 | 48 hr  |
| nuclear transport (GO:0051169)                                      | 7.85  | 9.31E-03 | 48 hr  |
| regulation of mRNA processing (GO:0050684)                          | 6.54  | 7.22E-04 | 48 hr  |
| gene expression (GO:0010467)                                        | 2.09  | 1.50E-08 | 48 hr  |
| RNA processing (GO:0006396)                                         | 4.18  | 4.41E-06 | 48 hr  |
| RNA splicing (GO:0008380)                                           | 4.61  | 1.24E-05 | 48 hr  |
| transcription by RNA polymerase II (GO:0006366)                     | 1.84  | 5.50E-03 | 48 hr  |
| negative regulation of cellular component organization (GO:0051129) | 5.93  | 2.51E-02 | 48 hr  |
| RNA catabolic process (GO:0006401)                                  | 4.66  | 5.62E-03 | 48 hr  |
| peptidyl-lysine modification (GO:0018205)                           | 4.05  | 3.42E-02 | 48 hr  |
| chromosome organization (GO:0051276)                                | 3.87  | 1.81E-04 | 48 hr  |

|                                              |      |          |       |
|----------------------------------------------|------|----------|-------|
| DNA metabolic process (GO:0006259)           | 3.41 | 3.16E-02 | 48 hr |
| mitotic cell cycle process (GO:1903047)      | 3.24 | 2.49E-03 | 48 hr |
| mitotic nuclear division (GO:0140014)        | 3.1  | 5.50E-03 | 48 hr |
| actin cytoskeleton organization (GO:0030036) | 2.94 | 2.33E-02 | 48 hr |
| nuclear speck (GO:0016607)                   | 7.79 | 1.12E-02 | 48 hr |
| transcription factor complex (GO:0005667)    | 5.5  | 3.59E-03 | 48 hr |
| actin filament (GO:0005884)                  | 4.27 | 4.40E-02 | 48 hr |
| cell-cell junction (GO:0005911)              | 4.05 | 2.99E-02 | 48 hr |
| nuclear envelope (GO:0005635)                | 3.64 | 2.88E-02 | 48 hr |
| nucleolus (GO:0005730)                       | 3.38 | 6.78E-03 | 48 hr |
| ribonucleoprotein complex (GO:1990904)       | 3.31 | 2.95E-04 | 48 hr |
| nuclear part (GO:0044428)                    | 3    | 5.00E-11 | 48 hr |
| microtubule cytoskeleton (GO:0015630)        | 2.54 | 3.17E-03 | 48 hr |
| cytoskeleton (GO:0005856)                    | 2.4  | 1.63E-04 | 48 hr |
| nuclear chromatin (GO:0000790)               | 2.12 | 1.72E-02 | 48 hr |
| chromosome (GO:0005694)                      | 2.1  | 7.90E-03 | 48 hr |
| intracellular organelle (GO:0043229)         | 2.02 | 4.84E-11 | 48 hr |
| protein-containing complex (GO:0032991)      | 1.59 | 7.67E-03 | 48 hr |

**Table S3. Log<sub>2</sub> fold changes and p-values of proteins and phosphoproteins reported in Figure 6**

| <b>Protein name<br/>(phosphosite)</b> | <b>Uniprot ID</b> | <b>30 min<br/>EE2<br/>log<sub>2</sub>FC</b> | <b>30 min EE2<br/>p-value</b> | <b>48 hr EE2<br/>log<sub>2</sub>FC</b> | <b>48 hr EE2<br/>p-value</b> |
|---------------------------------------|-------------------|---------------------------------------------|-------------------------------|----------------------------------------|------------------------------|
| CTNNB1                                | P35222            |                                             |                               | -0.311                                 | 0.021                        |
| CTNNB1<br>(S552)                      | P35222            | 0.551                                       | 0.033                         |                                        |                              |
| GSK3B                                 | P49841            | -0.220                                      | 0.085                         | -0.392                                 | 0.0153                       |
| KCTD1                                 | Q719H9            |                                             |                               | -1.547                                 | 0.012                        |
| MAP2K1                                | Q02750            |                                             |                               | 0.354                                  | 0.081                        |
| MAP2K2                                | P36507            |                                             |                               | 0.153                                  | 0.025                        |
| MAP2K3                                | P46734            |                                             |                               | 0.224                                  | 0.007                        |
| MAP2K6                                | P52564            | -0.404                                      | 0.078                         |                                        |                              |
| MAP3K1<br>(S923)                      | Q13233            | 0.164                                       | 0.129                         | 0.266                                  | 0.112                        |
| MAPK1 (Y187)                          | P28482            | 1.354                                       | 0.106                         |                                        |                              |
| MAPK14                                | Q16539            |                                             |                               | -0.216                                 | 0.032                        |
| PAK1                                  | Q13153            |                                             |                               | 0.455                                  | 0.007                        |
| PRKAR1A                               | P10644            |                                             |                               | -0.349                                 | 0.004                        |
| PRKAR1A<br>(S83)                      | P10644            | -0.673                                      | 0.003                         | -1.716                                 | 0.005                        |
| PRKAR1B                               | P31321            |                                             |                               | -1.047                                 | 0.011                        |
| PRKAR2A                               | P13861            | -0.322                                      | 0.003                         | 0.497                                  | 0.010                        |
| PRKAR2A<br>(S99)                      | P13861            | 0.458                                       | 0.026                         | 0.541                                  | 0.021                        |
| RHOA                                  | P61586            |                                             |                               | 0.345                                  | 0.002                        |
| ROCK1                                 | Q13464            |                                             |                               | 0.242                                  | 0.218                        |
| ROCK2                                 | O75116            | 0.270                                       | 0.028                         | 0.171                                  | 0.132                        |

**Table S4. Log<sub>2</sub> fold changes and p-values of phosphosites from substrate-kinase analyses after 30 minutes presented in Figure 6**

| <b>Kinase</b> | <b>Kinase Uniprot ID</b> | <b>Substrate phosphosite</b> | <b>Substrate Uniprot ID</b> | <b>30 min EE2 log<sub>2</sub>FC</b> | <b>30 min EE2 p-value</b> |
|---------------|--------------------------|------------------------------|-----------------------------|-------------------------------------|---------------------------|
| AKT1          | P31749                   | CARHSP1 S52                  | Q9Y2V2                      | 0.403                               | 0.0153                    |
| AKT1          | P31749                   | CTNNB1 S552                  | P35222                      | 0.551                               | 0.0331                    |
| AKT1          | P31749                   | HTT S419                     | P42858                      | -0.253                              | 0.0175                    |
| AKT1          | P31749                   | PEA15 S116                   | Q15121                      | 0.9                                 | 0.0031                    |
| GSK3B         | P49841                   | RCAN1 S163                   | Q9UKA8                      | -2.6                                | 0.0002                    |
| GSK3B         | P49841                   | DPYSL3 S522                  | Q14195                      | -0.96                               | 0.0082                    |
| GSK3B         | P49841                   | EIF4EBP1 S37                 | Q13541                      | -0.64                               | 0.0078                    |
| MAPK1         | P28482                   | EIF4EBP1 S37                 | Q13541                      | -0.64                               | 0.0078                    |
| MAPK1         | P28482                   | PML S527                     | P29590                      | -0.96                               | 0.0101                    |
| MAPK1         | P28482                   | STMN1 S38                    | P16949                      | -0.53                               | 0.0200                    |
| MAPK14        | Q16539                   | EIF4EBP1 S37                 | Q13541                      | -0.64                               | 0.0078                    |
| MAPK3         | P27361                   | STMN1 S38                    | P16949                      | -0.53                               | 0.0200                    |
| MAPK8         | P45983                   | EIF4ENIF1 S587               | Q9NRA8                      | -1.909                              | 0.0334                    |
| MAPK8         | P45983                   | STMN1 S38                    | P16949                      | -0.53                               | 0.0200                    |
| PAK1          | Q13153                   | CTNNB1 S552                  | P35222                      | 0.551                               | 0.0331                    |
| PAK1          | Q13153                   | FLNA S2152                   | P21333                      | 0.381                               | 0.0069                    |
| PAK1          | Q13153                   | STMN1 S16                    | P16949                      | 0.7                                 | 0.0151                    |
| PRKACA        | P17612                   | STMN1 S16                    | P16949                      | 0.7                                 | 0.0151                    |
| PRKACA        | P17612                   | SUFU S346                    | Q9UMX1                      | 0.6                                 | 0.0204                    |
| PRKACA        | P17612                   | NEDD4L S448                  | Q96PU5                      | -1.12                               | 0.0159                    |
| PRKACA        | P17612                   | FLNA S2152                   | P21333                      | 0.381                               | 0.0069                    |

**Table S5. Log2 fold changes and p-values of phosphosites from substrate-kinase analyses after 48 hours presented in Figure 6**

| <b>Kinase</b> | <b>Kinase Uniprot ID</b> | <b>Substrate phosphosite</b> | <b>Substrate Uniprot ID</b> | <b>48 hr EE2 log<sub>2</sub>FC</b> | <b>48 hr EE2 p-value</b> |
|---------------|--------------------------|------------------------------|-----------------------------|------------------------------------|--------------------------|
| AKT1          | P31749                   | PEA15 S116                   | Q15121                      | 0.519                              | 0.0418                   |
| AKT1          | P31749                   | CARHSP1 S52                  | Q9Y2V2                      | 0.478                              | 0.0117                   |
| AKT1          | P31749                   | CHEK1 S280                   | O14757                      | 0.865                              | 0.0041                   |
| GSK3B         | P49841                   | RCAN1 S163                   | Q9UKA8                      | -0.335                             | 0.0204                   |
| GSK3B         | P49841                   | MYC T58                      | P01106                      | -1.122                             | 0.0006                   |
| GSK3B         | P49841                   | DPYSL3 S509                  | Q14195                      | 0.23                               | 0.0274                   |
| MAPK1         | P28482                   | POLR2A S1920                 | P24928                      | -1.263                             | 0.0229                   |
| MAPK1         | P28482                   | POLR2A S1913                 | P24928                      | -1.302                             | 0.0089                   |
| MAPK1         | P28482                   | MYC S62                      | P01106                      | -1.109                             | 0.0013                   |
| MAPK1         | P28482                   | MYC T58                      | P01106                      | -1.122                             | 0.0006                   |
| MAPK1         | P28482                   | RPTOR S863                   | Q8N122                      | -0.16                              | 0.0124                   |
| MAPK1         | P28482                   | STMN1 S38                    | P16949                      | -1.16                              | 0.0016                   |
| MAPK3         | P27361                   | RPTOR S863                   | Q8N122                      | -0.16                              | 0.0124                   |
| MAPK3         | P27361                   | STMN1 S38                    | P16949                      | -1.16                              | 0.0016                   |
| MAPK3         | P27361                   | POLR2A S1920                 | P24928                      | -1.263                             | 0.0229                   |
| MAPK3         | P27361                   | POLR2A S1913                 | P24928                      | -1.302                             | 0.0089                   |
| MAPK8         | P45983                   | EIF4ENIF1 S587               | Q9NRA8                      | -1.909                             | 0.0302                   |
| MAPK8         | P45983                   | HNRNPK S216                  | P61978                      | 0.65                               | 0.0084                   |
| MAPK8         | P45983                   | MYC S62                      | P01106                      | -1.109                             | 0.0013                   |
| MAPK8         | P45983                   | STMN1 S38                    | P16949                      | -1.16                              | 0.0016                   |
| PAK1          | Q13153                   | STMN1 S38                    | P16949                      | -1.16                              | 0.0016                   |
| PRKACA        | P17612                   | CAD S1859                    | P27708                      | -0.925                             | 0.0404                   |
| PRKACA        | P17612                   | MAP2 S1782                   | P11137                      | -1.289                             | 0.0053                   |
